# Supplementary material for: Identification of cell proliferation, immune response and cell migration as critical pathways in a prognostic signature for HER2+:ERα- breast cancer
Source: PLoS One. 2017 Jun 20;12(6):e0179223. doi: 10.1371/journal.pone.0179223 (PMC5478114; doi:10.1371/journal.pone.0179223)
Supplement: S1 Table — (XLSX) [file pone.0179223.s004.xlsx]

## Sheet: Sheet1
Datasets and Samples with Microarray and HER2 IHC for 5-gene Amplicon Assessments
Datasets with Microarray and HER2 IHC	DataSets	Total Samples	HER2+ by 5 Amplicon Genes	Platform		Sample Results	GEODataset	SampleID	#AmpliconGene2fold	AMP	IHC			Correspondence between Amplicon gene 3 or more with 2 fold induction and HER2+ by IHC
	GSE16446	120	31	Affymetrix Human Genome U133 Plus 2.0 Array			GSE22358	GSM508680	5	1	0				Amp+ (3-5)	Amp- (0-2)
	GSE17907	109	10	Affymetrix Human Genome U133 Plus 2.0 Array			GSE21653	GSM540108	5	1	0			IHC+	246	108
	GSE19697	24	0	Affymetrix Human Genome U133 Plus 2.0 Array			GSE21653	GSM540113	5	1	0			IHC-	59	1420
	GSE20194	278	50	Affymetrix Human Genome U133A Array			GSE21653	GSM540171	5	1	0
	GSE21653	266	38	Affymetrix Human Genome U133 Plus 2.0 Array			GSE21653	GSM540336	5	1	0
	GSE22358	158	37	Agilent UNC Perou Lab Homo sapiens 1X44K Custom Array			GSE21653	GSM540339	5	1	0			Amp+ vs. Amp-
	GSE24185	103	21	Affymetrix Human Genome U133A Array			GSE21653	GSM540354	5	1	0			One constraint
	GSE25066	508	23	Affymetrix Human Genome U133A Array			GSE26639	GSM655632	5	1	0
	GSE2603	121	14	Affymetrix Human Genome U133A Array			GSE26639	GSM655636	5	1	0			N1:		305
	GSE26639	226	87	Affymetrix Human Genome U133 Plus 2.0 Array			GSE26639	GSM655675	5	1	0			N2:		1528
	GSE5460	129	24	Affymetrix Human Genome U133 Plus 2.0 Array			GSE26639	GSM655827	5	1	0			Deg. freedom:	1
							GSE26639	GSM655835	5	1	0			Chi^2:		883.54
							GSE26639	GSM655843	5	1	0			p(same):	3.7228e-194
							GSE16446	GSM411303	5	1	0			Monte Carlo p(same):	0.0001
							GSE16446	GSM411306	5	1	0			Fisher exact p(same):	7.7994e-158
							GSE16446	GSM411308	5	1	0
							GSE16446	GSM411318	5	1	0
							GSE16446	GSM411344	5	1	0			Sensitivity	0.694915
							GSE16446	GSM411359	5	1	0			Specificity	0.960108
							GSE16446	GSM411400	5	1	0			PPV	0.806557
							GSE24185	GSM594856	4	1	0			NPV	0.929319
							GSE24185	GSM594902	4	1	0
							GSE24185	GSM594923	4	1	0
							GSE22358	GSM508642	4	1	0
							GSE22358	GSM508739	4	1	0
							GSE2603	GSM50042	4	1	0
							GSE2603	GSM50078	4	1	0
							GSE2603	GSM50086	4	1	0
							GSE5460	GSM125077	4	1	0
							GSE21653	GSM540204	4	1	0
							GSE21653	GSM540231	4	1	0
							GSE26639	GSM655708	4	1	0
							GSE26639	GSM655742	4	1	0
							GSE26639	GSM655826	4	1	0
							GSE16446	GSM411317	4	1	0
							GSE20194	GSM505524	4	1	0
							GSE24185	GSM594859	3	1	0
							GSE22358	GSM508548	3	1	0
							GSE22358	GSM508556	3	1	0
							GSE22358	GSM508559	3	1	0
							GSE22358	GSM508675	3	1	0
							GSE22358	GSM508745	3	1	0
							GSE22358	GSM508763	3	1	0
							GSE22358	GSM508773	3	1	0
							GSE22358	GSM508776	3	1	0
							GSE25066	GSM615232	3	1	0
							GSE25066	GSM615703	3	1	0
							GSE25066	GSM615708	3	1	0
							GSE25066	GSM615760	3	1	0
							GSE21653	GSM540148	3	1	0
							GSE26639	GSM655667	3	1	0
							GSE26639	GSM655794	3	1	0
							GSE26639	GSM655842	3	1	0
							GSE16446	GSM411290	3	1	0
							GSE16446	GSM411324	3	1	0
							GSE16446	GSM411332	3	1	0
							GSE20194	GSM505396	3	1	0
							GSE20194	GSM505397	3	1	0
							GSE20194	GSM505402	3	1	0
							GSE22358	GSM508560	2	0	0
							GSE22358	GSM508561	2	0	0
							GSE22358	GSM508583	2	0	0
							GSE22358	GSM508673	2	0	0
							GSE22358	GSM508674	2	0	0
							GSE22358	GSM508768	2	0	0
							GSE22358	GSM508770	2	0	0
							GSE25066	GSM615105	2	0	0
							GSE25066	GSM615121	2	0	0
							GSE25066	GSM615200	2	0	0
							GSE25066	GSM615215	2	0	0
							GSE25066	GSM615241	2	0	0
							GSE25066	GSM615275	2	0	0
							GSE25066	GSM615281	2	0	0
							GSE25066	GSM615404	2	0	0
							GSE25066	GSM615647	2	0	0
							GSE25066	GSM615686	2	0	0
							GSE25066	GSM615690	2	0	0
							GSE25066	GSM615692	2	0	0
							GSE25066	GSM615694	2	0	0
							GSE25066	GSM615696	2	0	0
							GSE25066	GSM615698	2	0	0
							GSE25066	GSM615712	2	0	0
							GSE25066	GSM615726	2	0	0
							GSE2603	GSM50127	2	0	0
							GSE5460	GSM125044	2	0	0
							GSE5460	GSM125050	2	0	0
							GSE5460	GSM125100	2	0	0
							GSE21653	GSM540178	2	0	0
							GSE21653	GSM540201	2	0	0
							GSE21653	GSM540220	2	0	0
							GSE21653	GSM540249	2	0	0
							GSE21653	GSM540262	2	0	0
							GSE21653	GSM540266	2	0	0
							GSE21653	GSM540279	2	0	0
							GSE21653	GSM540313	2	0	0
							GSE21653	GSM540317	2	0	0
							GSE21653	GSM540320	2	0	0
							GSE21653	GSM540321	2	0	0
							GSE21653	GSM540346	2	0	0
							GSE26639	GSM655751	2	0	0
							GSE26639	GSM655766	2	0	0
							GSE26639	GSM655828	2	0	0
							GSE26639	GSM655832	2	0	0
							GSE26639	GSM655839	2	0	0
							GSE19697	GSM491621	2	0	0
							GSE16446	GSM411357	2	0	0
							GSE20194	GSM505392	2	0	0
							GSE20194	GSM505406	2	0	0
							GSE20194	GSM505500	2	0	0
							GSE20194	GSM505589	2	0	0
							GSE24185	GSM594953	1	0	0
							GSE22358	GSM508516	1	0	0
							GSE22358	GSM508517	1	0	0
							GSE22358	GSM508562	1	0	0
							GSE22358	GSM508570	1	0	0
							GSE22358	GSM508574	1	0	0
							GSE22358	GSM508575	1	0	0
							GSE22358	GSM508581	1	0	0
							GSE22358	GSM508637	1	0	0
							GSE22358	GSM508643	1	0	0
							GSE22358	GSM508649	1	0	0
							GSE22358	GSM508676	1	0	0
							GSE22358	GSM508678	1	0	0
							GSE22358	GSM508736	1	0	0
							GSE22358	GSM508741	1	0	0
							GSE22358	GSM508753	1	0	0
							GSE22358	GSM508762	1	0	0
							GSE22358	GSM508764	1	0	0
							GSE22358	GSM508765	1	0	0
							GSE22358	GSM517354	1	0	0
							GSE25066	GSM615096	1	0	0
							GSE25066	GSM615103	1	0	0
							GSE25066	GSM615108	1	0	0
							GSE25066	GSM615116	1	0	0
							GSE25066	GSM615122	1	0	0
							GSE25066	GSM615144	1	0	0
							GSE25066	GSM615147	1	0	0
							GSE25066	GSM615157	1	0	0
							GSE25066	GSM615165	1	0	0
							GSE25066	GSM615180	1	0	0
							GSE25066	GSM615183	1	0	0
							GSE25066	GSM615185	1	0	0
							GSE25066	GSM615186	1	0	0
							GSE25066	GSM615197	1	0	0
							GSE25066	GSM615198	1	0	0
							GSE25066	GSM615199	1	0	0
							GSE25066	GSM615205	1	0	0
							GSE25066	GSM615206	1	0	0
							GSE25066	GSM615207	1	0	0
							GSE25066	GSM615213	1	0	0
							GSE25066	GSM615222	1	0	0
							GSE25066	GSM615229	1	0	0
							GSE25066	GSM615234	1	0	0
							GSE25066	GSM615237	1	0	0
							GSE25066	GSM615246	1	0	0
							GSE25066	GSM615250	1	0	0
							GSE25066	GSM615254	1	0	0
							GSE25066	GSM615261	1	0	0
							GSE25066	GSM615263	1	0	0
							GSE25066	GSM615264	1	0	0
							GSE25066	GSM615266	1	0	0
							GSE25066	GSM615273	1	0	0
							GSE25066	GSM615277	1	0	0
							GSE25066	GSM615283	1	0	0
							GSE25066	GSM615284	1	0	0
							GSE25066	GSM615286	1	0	0
							GSE25066	GSM615289	1	0	0
							GSE25066	GSM615292	1	0	0
							GSE25066	GSM615299	1	0	0
							GSE25066	GSM615307	1	0	0
							GSE25066	GSM615308	1	0	0
							GSE25066	GSM615314	1	0	0
							GSE25066	GSM615340	1	0	0
							GSE25066	GSM615341	1	0	0
							GSE25066	GSM615344	1	0	0
							GSE25066	GSM615347	1	0	0
							GSE25066	GSM615349	1	0	0
							GSE25066	GSM615360	1	0	0
							GSE25066	GSM615362	1	0	0
							GSE25066	GSM615381	1	0	0
							GSE25066	GSM615386	1	0	0
							GSE25066	GSM615401	1	0	0
							GSE25066	GSM615641	1	0	0
							GSE25066	GSM615642	1	0	0
							GSE25066	GSM615645	1	0	0
							GSE25066	GSM615646	1	0	0
							GSE25066	GSM615652	1	0	0
							GSE25066	GSM615655	1	0	0
							GSE25066	GSM615665	1	0	0
							GSE25066	GSM615679	1	0	0
							GSE25066	GSM615685	1	0	0
							GSE25066	GSM615687	1	0	0
							GSE25066	GSM615700	1	0	0
							GSE25066	GSM615701	1	0	0
							GSE25066	GSM615707	1	0	0
							GSE25066	GSM615711	1	0	0
							GSE25066	GSM615718	1	0	0
							GSE25066	GSM615721	1	0	0
							GSE25066	GSM615722	1	0	0
							GSE25066	GSM615729	1	0	0
							GSE25066	GSM615733	1	0	0
							GSE25066	GSM615734	1	0	0
							GSE25066	GSM615738	1	0	0
							GSE25066	GSM615749	1	0	0
							GSE25066	GSM615752	1	0	0
							GSE25066	GSM615753	1	0	0
							GSE25066	GSM615754	1	0	0
							GSE25066	GSM615788	1	0	0
							GSE25066	GSM615789	1	0	0
							GSE25066	GSM615791	1	0	0
							GSE25066	GSM615792	1	0	0
							GSE25066	GSM615793	1	0	0
							GSE25066	GSM615800	1	0	0
							GSE25066	GSM615804	1	0	0
							GSE25066	GSM615811	1	0	0
							GSE25066	GSM615812	1	0	0
							GSE25066	GSM615814	1	0	0
							GSE25066	GSM615818	1	0	0
							GSE25066	GSM615826	1	0	0
							GSE2603	GSM50043	1	0	0
							GSE2603	GSM50044	1	0	0
							GSE2603	GSM50060	1	0	0
							GSE2603	GSM50074	1	0	0
							GSE2603	GSM50076	1	0	0
							GSE2603	GSM50079	1	0	0
							GSE2603	GSM50083	1	0	0
							GSE2603	GSM50095	1	0	0
							GSE2603	GSM50097	1	0	0
							GSE2603	GSM50125	1	0	0
							GSE5460	GSM124998	1	0	0
							GSE5460	GSM125000	1	0	0
							GSE5460	GSM125015	1	0	0
							GSE5460	GSM125032	1	0	0
							GSE5460	GSM125043	1	0	0
							GSE5460	GSM125045	1	0	0
							GSE5460	GSM125047	1	0	0
							GSE5460	GSM125049	1	0	0
							GSE5460	GSM125051	1	0	0
							GSE5460	GSM125056	1	0	0
							GSE5460	GSM125064	1	0	0
							GSE5460	GSM125080	1	0	0
							GSE5460	GSM125096	1	0	0
							GSE5460	GSM125105	1	0	0
							GSE5460	GSM125113	1	0	0
							GSE5460	GSM125117	1	0	0
							GSE5460	GSM125122	1	0	0
							GSE21653	GSM540128	1	0	0
							GSE21653	GSM540131	1	0	0
							GSE21653	GSM540135	1	0	0
							GSE21653	GSM540137	1	0	0
							GSE21653	GSM540152	1	0	0
							GSE21653	GSM540154	1	0	0
							GSE21653	GSM540161	1	0	0
							GSE21653	GSM540166	1	0	0
							GSE21653	GSM540182	1	0	0
							GSE21653	GSM540186	1	0	0
							GSE21653	GSM540194	1	0	0
							GSE21653	GSM540212	1	0	0
							GSE21653	GSM540221	1	0	0
							GSE21653	GSM540223	1	0	0
							GSE21653	GSM540224	1	0	0
							GSE21653	GSM540234	1	0	0
							GSE21653	GSM540243	1	0	0
							GSE21653	GSM540245	1	0	0
							GSE21653	GSM540247	1	0	0
							GSE21653	GSM540250	1	0	0
							GSE21653	GSM540283	1	0	0
							GSE21653	GSM540287	1	0	0
							GSE21653	GSM540319	1	0	0
							GSE21653	GSM540322	1	0	0
							GSE21653	GSM540334	1	0	0
							GSE21653	GSM540350	1	0	0
							GSE21653	GSM540353	1	0	0
							GSE26639	GSM655624	1	0	0
							GSE26639	GSM655637	1	0	0
							GSE26639	GSM655640	1	0	0
							GSE26639	GSM655668	1	0	0
							GSE26639	GSM655729	1	0	0
							GSE26639	GSM655733	1	0	0
							GSE26639	GSM655737	1	0	0
							GSE26639	GSM655747	1	0	0
							GSE26639	GSM655750	1	0	0
							GSE26639	GSM655757	1	0	0
							GSE26639	GSM655761	1	0	0
							GSE26639	GSM655765	1	0	0
							GSE26639	GSM655798	1	0	0
							GSE26639	GSM655819	1	0	0
							GSE19697	GSM491616	1	0	0
							GSE19697	GSM491619	1	0	0
							GSE19697	GSM491620	1	0	0
							GSE19697	GSM491623	1	0	0
							GSE19697	GSM491624	1	0	0
							GSE19697	GSM491625	1	0	0
							GSE19697	GSM491627	1	0	0
							GSE19697	GSM491629	1	0	0
							GSE19697	GSM491633	1	0	0
							GSE17907	GSM447208	1	0	0
							GSE17907	GSM447228	1	0	0
							GSE16446	GSM411343	1	0	0
							GSE20194	GSM505327	1	0	0
							GSE20194	GSM505334	1	0	0
							GSE20194	GSM505352	1	0	0
							GSE20194	GSM505353	1	0	0
							GSE20194	GSM505354	1	0	0
							GSE20194	GSM505357	1	0	0
							GSE20194	GSM505368	1	0	0
							GSE20194	GSM505374	1	0	0
							GSE20194	GSM505375	1	0	0
							GSE20194	GSM505393	1	0	0
							GSE20194	GSM505403	1	0	0
							GSE20194	GSM505407	1	0	0
							GSE20194	GSM505426	1	0	0
							GSE20194	GSM505430	1	0	0
							GSE20194	GSM505444	1	0	0
							GSE20194	GSM505449	1	0	0
							GSE20194	GSM505451	1	0	0
							GSE20194	GSM505457	1	0	0
							GSE20194	GSM505465	1	0	0
							GSE20194	GSM505473	1	0	0
							GSE20194	GSM505474	1	0	0
							GSE20194	GSM505477	1	0	0
							GSE20194	GSM505487	1	0	0
							GSE20194	GSM505491	1	0	0
							GSE20194	GSM505506	1	0	0
							GSE20194	GSM505509	1	0	0
							GSE20194	GSM505512	1	0	0
							GSE20194	GSM505529	1	0	0
							GSE20194	GSM505545	1	0	0
							GSE20194	GSM505585	1	0	0
							GSE20194	GSM505595	1	0	0
							GSE20194	GSM505599	1	0	0
							GSE24185	GSM594857	0	0	0
							GSE24185	GSM594858	0	0	0
							GSE24185	GSM594860	0	0	0
							GSE24185	GSM594862	0	0	0
							GSE24185	GSM594863	0	0	0
							GSE24185	GSM594864	0	0	0
							GSE24185	GSM594865	0	0	0
							GSE24185	GSM594866	0	0	0
							GSE24185	GSM594867	0	0	0
							GSE24185	GSM594871	0	0	0
							GSE24185	GSM594873	0	0	0
							GSE24185	GSM594883	0	0	0
							GSE24185	GSM594890	0	0	0
							GSE24185	GSM594891	0	0	0
							GSE24185	GSM594892	0	0	0
							GSE24185	GSM594893	0	0	0
							GSE24185	GSM594894	0	0	0
							GSE24185	GSM594895	0	0	0
							GSE24185	GSM594896	0	0	0
							GSE24185	GSM594897	0	0	0
							GSE24185	GSM594898	0	0	0
							GSE24185	GSM594899	0	0	0
							GSE24185	GSM594900	0	0	0
							GSE24185	GSM594904	0	0	0
							GSE24185	GSM594907	0	0	0
							GSE24185	GSM594909	0	0	0
							GSE24185	GSM594920	0	0	0
							GSE24185	GSM594921	0	0	0
							GSE24185	GSM594925	0	0	0
							GSE24185	GSM594926	0	0	0
							GSE24185	GSM594927	0	0	0
							GSE24185	GSM594929	0	0	0
							GSE24185	GSM594930	0	0	0
							GSE24185	GSM594931	0	0	0
							GSE24185	GSM594932	0	0	0
							GSE24185	GSM594933	0	0	0
							GSE24185	GSM594934	0	0	0
							GSE24185	GSM594935	0	0	0
							GSE24185	GSM594937	0	0	0
							GSE24185	GSM594938	0	0	0
							GSE24185	GSM594939	0	0	0
							GSE24185	GSM594941	0	0	0
							GSE24185	GSM594942	0	0	0
							GSE24185	GSM594943	0	0	0
							GSE24185	GSM594944	0	0	0
							GSE24185	GSM594945	0	0	0
							GSE24185	GSM594946	0	0	0
							GSE24185	GSM594947	0	0	0
							GSE24185	GSM594948	0	0	0
							GSE22358	GSM508518	0	0	0
							GSE22358	GSM508519	0	0	0
							GSE22358	GSM508520	0	0	0
							GSE22358	GSM508521	0	0	0
							GSE22358	GSM508522	0	0	0
							GSE22358	GSM508524	0	0	0
							GSE22358	GSM508526	0	0	0
							GSE22358	GSM508527	0	0	0
							GSE22358	GSM508544	0	0	0
							GSE22358	GSM508546	0	0	0
							GSE22358	GSM508547	0	0	0
							GSE22358	GSM508549	0	0	0
							GSE22358	GSM508553	0	0	0
							GSE22358	GSM508554	0	0	0
							GSE22358	GSM508557	0	0	0
							GSE22358	GSM508558	0	0	0
							GSE22358	GSM508567	0	0	0
							GSE22358	GSM508568	0	0	0
							GSE22358	GSM508569	0	0	0
							GSE22358	GSM508571	0	0	0
							GSE22358	GSM508572	0	0	0
							GSE22358	GSM508573	0	0	0
							GSE22358	GSM508577	0	0	0
							GSE22358	GSM508578	0	0	0
							GSE22358	GSM508579	0	0	0
							GSE22358	GSM508580	0	0	0
							GSE22358	GSM508582	0	0	0
							GSE22358	GSM508584	0	0	0
							GSE22358	GSM508585	0	0	0
							GSE22358	GSM508587	0	0	0
							GSE22358	GSM508590	0	0	0
							GSE22358	GSM508592	0	0	0
							GSE22358	GSM508632	0	0	0
							GSE22358	GSM508634	0	0	0
							GSE22358	GSM508638	0	0	0
							GSE22358	GSM508639	0	0	0
							GSE22358	GSM508644	0	0	0
							GSE22358	GSM508645	0	0	0
							GSE22358	GSM508646	0	0	0
							GSE22358	GSM508647	0	0	0
							GSE22358	GSM508648	0	0	0
							GSE22358	GSM508651	0	0	0
							GSE22358	GSM508652	0	0	0
							GSE22358	GSM508654	0	0	0
							GSE22358	GSM508655	0	0	0
							GSE22358	GSM508656	0	0	0
							GSE22358	GSM508657	0	0	0
							GSE22358	GSM508658	0	0	0
							GSE22358	GSM508659	0	0	0
							GSE22358	GSM508662	0	0	0
							GSE22358	GSM508663	0	0	0
							GSE22358	GSM508664	0	0	0
							GSE22358	GSM508665	0	0	0
							GSE22358	GSM508666	0	0	0
							GSE22358	GSM508668	0	0	0
							GSE22358	GSM508669	0	0	0
							GSE22358	GSM508671	0	0	0
							GSE22358	GSM508672	0	0	0
							GSE22358	GSM508677	0	0	0
							GSE22358	GSM508679	0	0	0
							GSE22358	GSM508681	0	0	0
							GSE22358	GSM508682	0	0	0
							GSE22358	GSM508737	0	0	0
							GSE22358	GSM508738	0	0	0
							GSE22358	GSM508740	0	0	0
							GSE22358	GSM508743	0	0	0
							GSE22358	GSM508744	0	0	0
							GSE22358	GSM508746	0	0	0
							GSE22358	GSM508747	0	0	0
							GSE22358	GSM508748	0	0	0
							GSE22358	GSM508750	0	0	0
							GSE22358	GSM508751	0	0	0
							GSE22358	GSM508752	0	0	0
							GSE22358	GSM508754	0	0	0
							GSE22358	GSM508755	0	0	0
							GSE22358	GSM508756	0	0	0
							GSE22358	GSM508757	0	0	0
							GSE22358	GSM508758	0	0	0
							GSE22358	GSM508759	0	0	0
							GSE22358	GSM508760	0	0	0
							GSE22358	GSM508761	0	0	0
							GSE22358	GSM508771	0	0	0
							GSE22358	GSM508772	0	0	0
							GSE25066	GSM615097	0	0	0
							GSE25066	GSM615098	0	0	0
							GSE25066	GSM615099	0	0	0
							GSE25066	GSM615100	0	0	0
							GSE25066	GSM615101	0	0	0
							GSE25066	GSM615102	0	0	0
							GSE25066	GSM615104	0	0	0
							GSE25066	GSM615106	0	0	0
							GSE25066	GSM615107	0	0	0
							GSE25066	GSM615109	0	0	0
							GSE25066	GSM615110	0	0	0
							GSE25066	GSM615111	0	0	0
							GSE25066	GSM615112	0	0	0
							GSE25066	GSM615113	0	0	0
							GSE25066	GSM615114	0	0	0
							GSE25066	GSM615115	0	0	0
							GSE25066	GSM615117	0	0	0
							GSE25066	GSM615118	0	0	0
							GSE25066	GSM615119	0	0	0
							GSE25066	GSM615120	0	0	0
							GSE25066	GSM615123	0	0	0
							GSE25066	GSM615124	0	0	0
							GSE25066	GSM615125	0	0	0
							GSE25066	GSM615126	0	0	0
							GSE25066	GSM615127	0	0	0
							GSE25066	GSM615128	0	0	0
							GSE25066	GSM615129	0	0	0
							GSE25066	GSM615130	0	0	0
							GSE25066	GSM615131	0	0	0
							GSE25066	GSM615132	0	0	0
							GSE25066	GSM615133	0	0	0
							GSE25066	GSM615134	0	0	0
							GSE25066	GSM615135	0	0	0
							GSE25066	GSM615136	0	0	0
							GSE25066	GSM615137	0	0	0
							GSE25066	GSM615138	0	0	0
							GSE25066	GSM615139	0	0	0
							GSE25066	GSM615140	0	0	0
							GSE25066	GSM615141	0	0	0
							GSE25066	GSM615142	0	0	0
							GSE25066	GSM615143	0	0	0
							GSE25066	GSM615145	0	0	0
							GSE25066	GSM615146	0	0	0
							GSE25066	GSM615148	0	0	0
							GSE25066	GSM615149	0	0	0
							GSE25066	GSM615150	0	0	0
							GSE25066	GSM615151	0	0	0
							GSE25066	GSM615152	0	0	0
							GSE25066	GSM615153	0	0	0
							GSE25066	GSM615154	0	0	0
							GSE25066	GSM615155	0	0	0
							GSE25066	GSM615156	0	0	0
							GSE25066	GSM615158	0	0	0
							GSE25066	GSM615159	0	0	0
							GSE25066	GSM615160	0	0	0
							GSE25066	GSM615161	0	0	0
							GSE25066	GSM615162	0	0	0
							GSE25066	GSM615163	0	0	0
							GSE25066	GSM615164	0	0	0
							GSE25066	GSM615166	0	0	0
							GSE25066	GSM615167	0	0	0
							GSE25066	GSM615168	0	0	0
							GSE25066	GSM615169	0	0	0
							GSE25066	GSM615170	0	0	0
							GSE25066	GSM615171	0	0	0
							GSE25066	GSM615172	0	0	0
							GSE25066	GSM615173	0	0	0
							GSE25066	GSM615174	0	0	0
							GSE25066	GSM615175	0	0	0
							GSE25066	GSM615176	0	0	0
							GSE25066	GSM615177	0	0	0
							GSE25066	GSM615178	0	0	0
							GSE25066	GSM615179	0	0	0
							GSE25066	GSM615181	0	0	0
							GSE25066	GSM615182	0	0	0
							GSE25066	GSM615184	0	0	0
							GSE25066	GSM615187	0	0	0
							GSE25066	GSM615188	0	0	0
							GSE25066	GSM615189	0	0	0
							GSE25066	GSM615190	0	0	0
							GSE25066	GSM615191	0	0	0
							GSE25066	GSM615192	0	0	0
							GSE25066	GSM615193	0	0	0
							GSE25066	GSM615194	0	0	0
							GSE25066	GSM615195	0	0	0
							GSE25066	GSM615196	0	0	0
							GSE25066	GSM615201	0	0	0
							GSE25066	GSM615202	0	0	0
							GSE25066	GSM615204	0	0	0
							GSE25066	GSM615208	0	0	0
							GSE25066	GSM615211	0	0	0
							GSE25066	GSM615212	0	0	0
							GSE25066	GSM615214	0	0	0
							GSE25066	GSM615216	0	0	0
							GSE25066	GSM615217	0	0	0
							GSE25066	GSM615218	0	0	0
							GSE25066	GSM615219	0	0	0
							GSE25066	GSM615220	0	0	0
							GSE25066	GSM615221	0	0	0
							GSE25066	GSM615223	0	0	0
							GSE25066	GSM615225	0	0	0
							GSE25066	GSM615226	0	0	0
							GSE25066	GSM615227	0	0	0
							GSE25066	GSM615228	0	0	0
							GSE25066	GSM615231	0	0	0
							GSE25066	GSM615233	0	0	0
							GSE25066	GSM615235	0	0	0
							GSE25066	GSM615239	0	0	0
							GSE25066	GSM615240	0	0	0
							GSE25066	GSM615242	0	0	0
							GSE25066	GSM615243	0	0	0
							GSE25066	GSM615244	0	0	0
							GSE25066	GSM615245	0	0	0
							GSE25066	GSM615247	0	0	0
							GSE25066	GSM615248	0	0	0
							GSE25066	GSM615249	0	0	0
							GSE25066	GSM615251	0	0	0
							GSE25066	GSM615252	0	0	0
							GSE25066	GSM615253	0	0	0
							GSE25066	GSM615255	0	0	0
							GSE25066	GSM615256	0	0	0
							GSE25066	GSM615257	0	0	0
							GSE25066	GSM615258	0	0	0
							GSE25066	GSM615259	0	0	0
							GSE25066	GSM615260	0	0	0
							GSE25066	GSM615262	0	0	0
							GSE25066	GSM615265	0	0	0
							GSE25066	GSM615268	0	0	0
							GSE25066	GSM615269	0	0	0
							GSE25066	GSM615270	0	0	0
							GSE25066	GSM615272	0	0	0
							GSE25066	GSM615274	0	0	0
							GSE25066	GSM615276	0	0	0
							GSE25066	GSM615278	0	0	0
							GSE25066	GSM615279	0	0	0
							GSE25066	GSM615282	0	0	0
							GSE25066	GSM615285	0	0	0
							GSE25066	GSM615287	0	0	0
							GSE25066	GSM615288	0	0	0
							GSE25066	GSM615290	0	0	0
							GSE25066	GSM615291	0	0	0
							GSE25066	GSM615293	0	0	0
							GSE25066	GSM615294	0	0	0
							GSE25066	GSM615295	0	0	0
							GSE25066	GSM615296	0	0	0
							GSE25066	GSM615297	0	0	0
							GSE25066	GSM615298	0	0	0
							GSE25066	GSM615300	0	0	0
							GSE25066	GSM615301	0	0	0
							GSE25066	GSM615302	0	0	0
							GSE25066	GSM615303	0	0	0
							GSE25066	GSM615304	0	0	0
							GSE25066	GSM615305	0	0	0
							GSE25066	GSM615306	0	0	0
							GSE25066	GSM615309	0	0	0
							GSE25066	GSM615310	0	0	0
							GSE25066	GSM615311	0	0	0
							GSE25066	GSM615312	0	0	0
							GSE25066	GSM615313	0	0	0
							GSE25066	GSM615315	0	0	0
							GSE25066	GSM615316	0	0	0
							GSE25066	GSM615317	0	0	0
							GSE25066	GSM615318	0	0	0
							GSE25066	GSM615319	0	0	0
							GSE25066	GSM615320	0	0	0
							GSE25066	GSM615321	0	0	0
							GSE25066	GSM615322	0	0	0
							GSE25066	GSM615323	0	0	0
							GSE25066	GSM615324	0	0	0
							GSE25066	GSM615325	0	0	0
							GSE25066	GSM615326	0	0	0
							GSE25066	GSM615327	0	0	0
							GSE25066	GSM615328	0	0	0
							GSE25066	GSM615329	0	0	0
							GSE25066	GSM615330	0	0	0
							GSE25066	GSM615331	0	0	0
							GSE25066	GSM615332	0	0	0
							GSE25066	GSM615333	0	0	0
							GSE25066	GSM615334	0	0	0
							GSE25066	GSM615335	0	0	0
							GSE25066	GSM615336	0	0	0
							GSE25066	GSM615337	0	0	0
							GSE25066	GSM615338	0	0	0
							GSE25066	GSM615339	0	0	0
							GSE25066	GSM615342	0	0	0
							GSE25066	GSM615343	0	0	0
							GSE25066	GSM615345	0	0	0
							GSE25066	GSM615346	0	0	0
							GSE25066	GSM615348	0	0	0
							GSE25066	GSM615350	0	0	0
							GSE25066	GSM615351	0	0	0
							GSE25066	GSM615352	0	0	0
							GSE25066	GSM615353	0	0	0
							GSE25066	GSM615354	0	0	0
							GSE25066	GSM615355	0	0	0
							GSE25066	GSM615356	0	0	0
							GSE25066	GSM615357	0	0	0
							GSE25066	GSM615358	0	0	0
							GSE25066	GSM615359	0	0	0
							GSE25066	GSM615361	0	0	0
							GSE25066	GSM615363	0	0	0
							GSE25066	GSM615364	0	0	0
							GSE25066	GSM615366	0	0	0
							GSE25066	GSM615367	0	0	0
							GSE25066	GSM615368	0	0	0
							GSE25066	GSM615369	0	0	0
							GSE25066	GSM615370	0	0	0
							GSE25066	GSM615371	0	0	0
							GSE25066	GSM615372	0	0	0
							GSE25066	GSM615373	0	0	0
							GSE25066	GSM615375	0	0	0
							GSE25066	GSM615376	0	0	0
							GSE25066	GSM615377	0	0	0
							GSE25066	GSM615378	0	0	0
							GSE25066	GSM615379	0	0	0
							GSE25066	GSM615380	0	0	0
							GSE25066	GSM615382	0	0	0
							GSE25066	GSM615383	0	0	0
							GSE25066	GSM615384	0	0	0
							GSE25066	GSM615385	0	0	0
							GSE25066	GSM615387	0	0	0
							GSE25066	GSM615388	0	0	0
							GSE25066	GSM615389	0	0	0
							GSE25066	GSM615390	0	0	0
							GSE25066	GSM615391	0	0	0
							GSE25066	GSM615392	0	0	0
							GSE25066	GSM615393	0	0	0
							GSE25066	GSM615394	0	0	0
							GSE25066	GSM615395	0	0	0
							GSE25066	GSM615396	0	0	0
							GSE25066	GSM615397	0	0	0
							GSE25066	GSM615398	0	0	0
							GSE25066	GSM615399	0	0	0
							GSE25066	GSM615400	0	0	0
							GSE25066	GSM615402	0	0	0
							GSE25066	GSM615403	0	0	0
							GSE25066	GSM615405	0	0	0
							GSE25066	GSM615631	0	0	0
							GSE25066	GSM615632	0	0	0
							GSE25066	GSM615633	0	0	0
							GSE25066	GSM615634	0	0	0
							GSE25066	GSM615635	0	0	0
							GSE25066	GSM615636	0	0	0
							GSE25066	GSM615637	0	0	0
							GSE25066	GSM615638	0	0	0
							GSE25066	GSM615639	0	0	0
							GSE25066	GSM615640	0	0	0
							GSE25066	GSM615643	0	0	0
							GSE25066	GSM615644	0	0	0
							GSE25066	GSM615648	0	0	0
							GSE25066	GSM615649	0	0	0
							GSE25066	GSM615650	0	0	0
							GSE25066	GSM615651	0	0	0
							GSE25066	GSM615653	0	0	0
							GSE25066	GSM615654	0	0	0
							GSE25066	GSM615656	0	0	0
							GSE25066	GSM615657	0	0	0
							GSE25066	GSM615658	0	0	0
							GSE25066	GSM615659	0	0	0
							GSE25066	GSM615660	0	0	0
							GSE25066	GSM615661	0	0	0
							GSE25066	GSM615662	0	0	0
							GSE25066	GSM615663	0	0	0
							GSE25066	GSM615664	0	0	0
							GSE25066	GSM615666	0	0	0
							GSE25066	GSM615667	0	0	0
							GSE25066	GSM615668	0	0	0
							GSE25066	GSM615669	0	0	0
							GSE25066	GSM615670	0	0	0
							GSE25066	GSM615671	0	0	0
							GSE25066	GSM615672	0	0	0
							GSE25066	GSM615673	0	0	0
							GSE25066	GSM615674	0	0	0
							GSE25066	GSM615675	0	0	0
							GSE25066	GSM615676	0	0	0
							GSE25066	GSM615677	0	0	0
							GSE25066	GSM615678	0	0	0
							GSE25066	GSM615680	0	0	0
							GSE25066	GSM615681	0	0	0
							GSE25066	GSM615682	0	0	0
							GSE25066	GSM615683	0	0	0
							GSE25066	GSM615684	0	0	0
							GSE25066	GSM615691	0	0	0
							GSE25066	GSM615693	0	0	0
							GSE25066	GSM615699	0	0	0
							GSE25066	GSM615702	0	0	0
							GSE25066	GSM615704	0	0	0
							GSE25066	GSM615706	0	0	0
							GSE25066	GSM615709	0	0	0
							GSE25066	GSM615710	0	0	0
							GSE25066	GSM615713	0	0	0
							GSE25066	GSM615714	0	0	0
							GSE25066	GSM615715	0	0	0
							GSE25066	GSM615716	0	0	0
							GSE25066	GSM615717	0	0	0
							GSE25066	GSM615719	0	0	0
							GSE25066	GSM615720	0	0	0
							GSE25066	GSM615723	0	0	0
							GSE25066	GSM615724	0	0	0
							GSE25066	GSM615725	0	0	0
							GSE25066	GSM615727	0	0	0
							GSE25066	GSM615728	0	0	0
							GSE25066	GSM615730	0	0	0
							GSE25066	GSM615731	0	0	0
							GSE25066	GSM615732	0	0	0
							GSE25066	GSM615735	0	0	0
							GSE25066	GSM615736	0	0	0
							GSE25066	GSM615739	0	0	0
							GSE25066	GSM615740	0	0	0
							GSE25066	GSM615741	0	0	0
							GSE25066	GSM615742	0	0	0
							GSE25066	GSM615744	0	0	0
							GSE25066	GSM615745	0	0	0
							GSE25066	GSM615747	0	0	0
							GSE25066	GSM615748	0	0	0
							GSE25066	GSM615751	0	0	0
							GSE25066	GSM615755	0	0	0
							GSE25066	GSM615756	0	0	0
							GSE25066	GSM615757	0	0	0
							GSE25066	GSM615758	0	0	0
							GSE25066	GSM615759	0	0	0
							GSE25066	GSM615761	0	0	0
							GSE25066	GSM615762	0	0	0
							GSE25066	GSM615763	0	0	0
							GSE25066	GSM615764	0	0	0
							GSE25066	GSM615765	0	0	0
							GSE25066	GSM615766	0	0	0
							GSE25066	GSM615767	0	0	0
							GSE25066	GSM615768	0	0	0
							GSE25066	GSM615769	0	0	0
							GSE25066	GSM615770	0	0	0
							GSE25066	GSM615771	0	0	0
							GSE25066	GSM615773	0	0	0
							GSE25066	GSM615776	0	0	0
							GSE25066	GSM615777	0	0	0
							GSE25066	GSM615778	0	0	0
							GSE25066	GSM615779	0	0	0
							GSE25066	GSM615780	0	0	0
							GSE25066	GSM615781	0	0	0
							GSE25066	GSM615782	0	0	0
							GSE25066	GSM615783	0	0	0
							GSE25066	GSM615784	0	0	0
							GSE25066	GSM615786	0	0	0
							GSE25066	GSM615787	0	0	0
							GSE25066	GSM615790	0	0	0
							GSE25066	GSM615794	0	0	0
							GSE25066	GSM615795	0	0	0
							GSE25066	GSM615798	0	0	0
							GSE25066	GSM615799	0	0	0
							GSE25066	GSM615801	0	0	0
							GSE25066	GSM615802	0	0	0
							GSE25066	GSM615806	0	0	0
							GSE25066	GSM615807	0	0	0
							GSE25066	GSM615808	0	0	0
							GSE25066	GSM615809	0	0	0
							GSE25066	GSM615810	0	0	0
							GSE25066	GSM615813	0	0	0
							GSE25066	GSM615815	0	0	0
							GSE25066	GSM615816	0	0	0
							GSE25066	GSM615817	0	0	0
							GSE25066	GSM615819	0	0	0
							GSE25066	GSM615820	0	0	0
							GSE25066	GSM615821	0	0	0
							GSE25066	GSM615822	0	0	0
							GSE25066	GSM615823	0	0	0
							GSE25066	GSM615824	0	0	0
							GSE25066	GSM615825	0	0	0
							GSE25066	GSM615827	0	0	0
							GSE25066	GSM615828	0	0	0
							GSE2603	GSM50035	0	0	0
							GSE2603	GSM50036	0	0	0
							GSE2603	GSM50038	0	0	0
							GSE2603	GSM50039	0	0	0
							GSE2603	GSM50040	0	0	0
							GSE2603	GSM50046	0	0	0
							GSE2603	GSM50047	0	0	0
							GSE2603	GSM50048	0	0	0
							GSE2603	GSM50049	0	0	0
							GSE2603	GSM50051	0	0	0
							GSE2603	GSM50052	0	0	0
							GSE2603	GSM50053	0	0	0
							GSE2603	GSM50054	0	0	0
							GSE2603	GSM50055	0	0	0
							GSE2603	GSM50059	0	0	0
							GSE2603	GSM50061	0	0	0
							GSE2603	GSM50062	0	0	0
							GSE2603	GSM50063	0	0	0
							GSE2603	GSM50064	0	0	0
							GSE2603	GSM50066	0	0	0
							GSE2603	GSM50067	0	0	0
							GSE2603	GSM50068	0	0	0
							GSE2603	GSM50069	0	0	0
							GSE2603	GSM50070	0	0	0
							GSE2603	GSM50071	0	0	0
							GSE2603	GSM50073	0	0	0
							GSE2603	GSM50075	0	0	0
							GSE2603	GSM50077	0	0	0
							GSE2603	GSM50080	0	0	0
							GSE2603	GSM50084	0	0	0
							GSE2603	GSM50087	0	0	0
							GSE2603	GSM50089	0	0	0
							GSE2603	GSM50091	0	0	0
							GSE2603	GSM50092	0	0	0
							GSE2603	GSM50093	0	0	0
							GSE2603	GSM50094	0	0	0
							GSE2603	GSM50096	0	0	0
							GSE2603	GSM50098	0	0	0
							GSE2603	GSM50100	0	0	0
							GSE2603	GSM50101	0	0	0
							GSE2603	GSM50102	0	0	0
							GSE2603	GSM50104	0	0	0
							GSE2603	GSM50106	0	0	0
							GSE2603	GSM50107	0	0	0
							GSE2603	GSM50108	0	0	0
							GSE2603	GSM50110	0	0	0
							GSE2603	GSM50111	0	0	0
							GSE2603	GSM50112	0	0	0
							GSE2603	GSM50113	0	0	0
							GSE2603	GSM50114	0	0	0
							GSE2603	GSM50115	0	0	0
							GSE2603	GSM50118	0	0	0
							GSE2603	GSM50119	0	0	0
							GSE2603	GSM50120	0	0	0
							GSE2603	GSM50121	0	0	0
							GSE2603	GSM50122	0	0	0
							GSE2603	GSM50123	0	0	0
							GSE2603	GSM50124	0	0	0
							GSE2603	GSM50128	0	0	0
							GSE2603	GSM50131	0	0	0
							GSE2603	GSM50132	0	0	0
							GSE5460	GSM124995	0	0	0
							GSE5460	GSM124997	0	0	0
							GSE5460	GSM125002	0	0	0
							GSE5460	GSM125003	0	0	0
							GSE5460	GSM125004	0	0	0
							GSE5460	GSM125005	0	0	0
							GSE5460	GSM125006	0	0	0
							GSE5460	GSM125007	0	0	0
							GSE5460	GSM125008	0	0	0
							GSE5460	GSM125009	0	0	0
							GSE5460	GSM125010	0	0	0
							GSE5460	GSM125011	0	0	0
							GSE5460	GSM125012	0	0	0
							GSE5460	GSM125014	0	0	0
							GSE5460	GSM125016	0	0	0
							GSE5460	GSM125017	0	0	0
							GSE5460	GSM125018	0	0	0
							GSE5460	GSM125019	0	0	0
							GSE5460	GSM125020	0	0	0
							GSE5460	GSM125022	0	0	0
							GSE5460	GSM125023	0	0	0
							GSE5460	GSM125024	0	0	0
							GSE5460	GSM125025	0	0	0
							GSE5460	GSM125026	0	0	0
							GSE5460	GSM125028	0	0	0
							GSE5460	GSM125030	0	0	0
							GSE5460	GSM125031	0	0	0
							GSE5460	GSM125035	0	0	0
							GSE5460	GSM125038	0	0	0
							GSE5460	GSM125041	0	0	0
							GSE5460	GSM125042	0	0	0
							GSE5460	GSM125046	0	0	0
							GSE5460	GSM125052	0	0	0
							GSE5460	GSM125053	0	0	0
							GSE5460	GSM125054	0	0	0
							GSE5460	GSM125055	0	0	0
							GSE5460	GSM125057	0	0	0
							GSE5460	GSM125058	0	0	0
							GSE5460	GSM125059	0	0	0
							GSE5460	GSM125060	0	0	0
							GSE5460	GSM125061	0	0	0
							GSE5460	GSM125062	0	0	0
							GSE5460	GSM125063	0	0	0
							GSE5460	GSM125065	0	0	0
							GSE5460	GSM125067	0	0	0
							GSE5460	GSM125068	0	0	0
							GSE5460	GSM125071	0	0	0
							GSE5460	GSM125074	0	0	0
							GSE5460	GSM125075	0	0	0
							GSE5460	GSM125079	0	0	0
							GSE5460	GSM125081	0	0	0
							GSE5460	GSM125082	0	0	0
							GSE5460	GSM125083	0	0	0
							GSE5460	GSM125084	0	0	0
							GSE5460	GSM125086	0	0	0
							GSE5460	GSM125088	0	0	0
							GSE5460	GSM125089	0	0	0
							GSE5460	GSM125091	0	0	0
							GSE5460	GSM125092	0	0	0
							GSE5460	GSM125093	0	0	0
							GSE5460	GSM125094	0	0	0
							GSE5460	GSM125095	0	0	0
							GSE5460	GSM125097	0	0	0
							GSE5460	GSM125098	0	0	0
							GSE5460	GSM125099	0	0	0
							GSE5460	GSM125101	0	0	0
							GSE5460	GSM125102	0	0	0
							GSE5460	GSM125103	0	0	0
							GSE5460	GSM125106	0	0	0
							GSE5460	GSM125107	0	0	0
							GSE5460	GSM125108	0	0	0
							GSE5460	GSM125111	0	0	0
							GSE5460	GSM125112	0	0	0
							GSE5460	GSM125114	0	0	0
							GSE5460	GSM125118	0	0	0
							GSE5460	GSM125119	0	0	0
							GSE5460	GSM125121	0	0	0
							GSE21653	GSM540112	0	0	0
							GSE21653	GSM540114	0	0	0
							GSE21653	GSM540115	0	0	0
							GSE21653	GSM540116	0	0	0
							GSE21653	GSM540117	0	0	0
							GSE21653	GSM540118	0	0	0
							GSE21653	GSM540119	0	0	0
							GSE21653	GSM540120	0	0	0
							GSE21653	GSM540121	0	0	0
							GSE21653	GSM540122	0	0	0
							GSE21653	GSM540123	0	0	0
							GSE21653	GSM540125	0	0	0
							GSE21653	GSM540126	0	0	0
							GSE21653	GSM540127	0	0	0
							GSE21653	GSM540129	0	0	0
							GSE21653	GSM540130	0	0	0
							GSE21653	GSM540132	0	0	0
							GSE21653	GSM540133	0	0	0
							GSE21653	GSM540134	0	0	0
							GSE21653	GSM540136	0	0	0
							GSE21653	GSM540138	0	0	0
							GSE21653	GSM540140	0	0	0
							GSE21653	GSM540141	0	0	0
							GSE21653	GSM540142	0	0	0
							GSE21653	GSM540143	0	0	0
							GSE21653	GSM540144	0	0	0
							GSE21653	GSM540145	0	0	0
							GSE21653	GSM540146	0	0	0
							GSE21653	GSM540149	0	0	0
							GSE21653	GSM540150	0	0	0
							GSE21653	GSM540151	0	0	0
							GSE21653	GSM540153	0	0	0
							GSE21653	GSM540156	0	0	0
							GSE21653	GSM540157	0	0	0
							GSE21653	GSM540158	0	0	0
							GSE21653	GSM540159	0	0	0
							GSE21653	GSM540160	0	0	0
							GSE21653	GSM540163	0	0	0
							GSE21653	GSM540164	0	0	0
							GSE21653	GSM540165	0	0	0
							GSE21653	GSM540167	0	0	0
							GSE21653	GSM540168	0	0	0
							GSE21653	GSM540169	0	0	0
							GSE21653	GSM540170	0	0	0
							GSE21653	GSM540172	0	0	0
							GSE21653	GSM540173	0	0	0
							GSE21653	GSM540176	0	0	0
							GSE21653	GSM540177	0	0	0
							GSE21653	GSM540179	0	0	0
							GSE21653	GSM540181	0	0	0
							GSE21653	GSM540183	0	0	0
							GSE21653	GSM540184	0	0	0
							GSE21653	GSM540188	0	0	0
							GSE21653	GSM540189	0	0	0
							GSE21653	GSM540190	0	0	0
							GSE21653	GSM540191	0	0	0
							GSE21653	GSM540192	0	0	0
							GSE21653	GSM540193	0	0	0
							GSE21653	GSM540195	0	0	0
							GSE21653	GSM540196	0	0	0
							GSE21653	GSM540197	0	0	0
							GSE21653	GSM540198	0	0	0
							GSE21653	GSM540199	0	0	0
							GSE21653	GSM540200	0	0	0
							GSE21653	GSM540202	0	0	0
							GSE21653	GSM540203	0	0	0
							GSE21653	GSM540205	0	0	0
							GSE21653	GSM540207	0	0	0
							GSE21653	GSM540208	0	0	0
							GSE21653	GSM540209	0	0	0
							GSE21653	GSM540213	0	0	0
							GSE21653	GSM540214	0	0	0
							GSE21653	GSM540215	0	0	0
							GSE21653	GSM540217	0	0	0
							GSE21653	GSM540218	0	0	0
							GSE21653	GSM540219	0	0	0
							GSE21653	GSM540225	0	0	0
							GSE21653	GSM540226	0	0	0
							GSE21653	GSM540228	0	0	0
							GSE21653	GSM540229	0	0	0
							GSE21653	GSM540230	0	0	0
							GSE21653	GSM540232	0	0	0
							GSE21653	GSM540233	0	0	0
							GSE21653	GSM540237	0	0	0
							GSE21653	GSM540238	0	0	0
							GSE21653	GSM540239	0	0	0
							GSE21653	GSM540240	0	0	0
							GSE21653	GSM540241	0	0	0
							GSE21653	GSM540242	0	0	0
							GSE21653	GSM540244	0	0	0
							GSE21653	GSM540246	0	0	0
							GSE21653	GSM540248	0	0	0
							GSE21653	GSM540253	0	0	0
							GSE21653	GSM540254	0	0	0
							GSE21653	GSM540255	0	0	0
							GSE21653	GSM540256	0	0	0
							GSE21653	GSM540258	0	0	0
							GSE21653	GSM540259	0	0	0
							GSE21653	GSM540260	0	0	0
							GSE21653	GSM540261	0	0	0
							GSE21653	GSM540263	0	0	0
							GSE21653	GSM540264	0	0	0
							GSE21653	GSM540267	0	0	0
							GSE21653	GSM540269	0	0	0
							GSE21653	GSM540271	0	0	0
							GSE21653	GSM540273	0	0	0
							GSE21653	GSM540275	0	0	0
							GSE21653	GSM540276	0	0	0
							GSE21653	GSM540277	0	0	0
							GSE21653	GSM540278	0	0	0
							GSE21653	GSM540281	0	0	0
							GSE21653	GSM540284	0	0	0
							GSE21653	GSM540285	0	0	0
							GSE21653	GSM540286	0	0	0
							GSE21653	GSM540288	0	0	0
							GSE21653	GSM540292	0	0	0
							GSE21653	GSM540293	0	0	0
							GSE21653	GSM540294	0	0	0
							GSE21653	GSM540296	0	0	0
							GSE21653	GSM540298	0	0	0
							GSE21653	GSM540299	0	0	0
							GSE21653	GSM540302	0	0	0
							GSE21653	GSM540303	0	0	0
							GSE21653	GSM540304	0	0	0
							GSE21653	GSM540305	0	0	0
							GSE21653	GSM540306	0	0	0
							GSE21653	GSM540307	0	0	0
							GSE21653	GSM540308	0	0	0
							GSE21653	GSM540310	0	0	0
							GSE21653	GSM540314	0	0	0
							GSE21653	GSM540316	0	0	0
							GSE21653	GSM540318	0	0	0
							GSE21653	GSM540325	0	0	0
							GSE21653	GSM540328	0	0	0
							GSE21653	GSM540329	0	0	0
							GSE21653	GSM540330	0	0	0
							GSE21653	GSM540332	0	0	0
							GSE21653	GSM540333	0	0	0
							GSE21653	GSM540337	0	0	0
							GSE21653	GSM540338	0	0	0
							GSE21653	GSM540341	0	0	0
							GSE21653	GSM540342	0	0	0
							GSE21653	GSM540343	0	0	0
							GSE21653	GSM540344	0	0	0
							GSE21653	GSM540345	0	0	0
							GSE21653	GSM540348	0	0	0
							GSE21653	GSM540349	0	0	0
							GSE21653	GSM540351	0	0	0
							GSE21653	GSM540352	0	0	0
							GSE21653	GSM540355	0	0	0
							GSE21653	GSM540356	0	0	0
							GSE21653	GSM540357	0	0	0
							GSE21653	GSM540358	0	0	0
							GSE21653	GSM540359	0	0	0
							GSE21653	GSM540360	0	0	0
							GSE21653	GSM540361	0	0	0
							GSE21653	GSM540362	0	0	0
							GSE21653	GSM540363	0	0	0
							GSE21653	GSM540364	0	0	0
							GSE21653	GSM540365	0	0	0
							GSE21653	GSM540366	0	0	0
							GSE21653	GSM540367	0	0	0
							GSE21653	GSM540368	0	0	0
							GSE21653	GSM540369	0	0	0
							GSE21653	GSM540370	0	0	0
							GSE21653	GSM540371	0	0	0
							GSE21653	GSM540372	0	0	0
							GSE21653	GSM540373	0	0	0
							GSE26639	GSM655626	0	0	0
							GSE26639	GSM655628	0	0	0
							GSE26639	GSM655629	0	0	0
							GSE26639	GSM655630	0	0	0
							GSE26639	GSM655633	0	0	0
							GSE26639	GSM655635	0	0	0
							GSE26639	GSM655638	0	0	0
							GSE26639	GSM655642	0	0	0
							GSE26639	GSM655643	0	0	0
							GSE26639	GSM655644	0	0	0
							GSE26639	GSM655647	0	0	0
							GSE26639	GSM655648	0	0	0
							GSE26639	GSM655649	0	0	0
							GSE26639	GSM655650	0	0	0
							GSE26639	GSM655653	0	0	0
							GSE26639	GSM655654	0	0	0
							GSE26639	GSM655655	0	0	0
							GSE26639	GSM655659	0	0	0
							GSE26639	GSM655660	0	0	0
							GSE26639	GSM655661	0	0	0
							GSE26639	GSM655662	0	0	0
							GSE26639	GSM655663	0	0	0
							GSE26639	GSM655666	0	0	0
							GSE26639	GSM655670	0	0	0
							GSE26639	GSM655672	0	0	0
							GSE26639	GSM655674	0	0	0
							GSE26639	GSM655676	0	0	0
							GSE26639	GSM655677	0	0	0
							GSE26639	GSM655678	0	0	0
							GSE26639	GSM655679	0	0	0
							GSE26639	GSM655684	0	0	0
							GSE26639	GSM655687	0	0	0
							GSE26639	GSM655690	0	0	0
							GSE26639	GSM655692	0	0	0
							GSE26639	GSM655693	0	0	0
							GSE26639	GSM655695	0	0	0
							GSE26639	GSM655696	0	0	0
							GSE26639	GSM655699	0	0	0
							GSE26639	GSM655703	0	0	0
							GSE26639	GSM655704	0	0	0
							GSE26639	GSM655705	0	0	0
							GSE26639	GSM655706	0	0	0
							GSE26639	GSM655707	0	0	0
							GSE26639	GSM655709	0	0	0
							GSE26639	GSM655711	0	0	0
							GSE26639	GSM655712	0	0	0
							GSE26639	GSM655713	0	0	0
							GSE26639	GSM655714	0	0	0
							GSE26639	GSM655716	0	0	0
							GSE26639	GSM655717	0	0	0
							GSE26639	GSM655718	0	0	0
							GSE26639	GSM655719	0	0	0
							GSE26639	GSM655720	0	0	0
							GSE26639	GSM655721	0	0	0
							GSE26639	GSM655723	0	0	0
							GSE26639	GSM655724	0	0	0
							GSE26639	GSM655725	0	0	0
							GSE26639	GSM655726	0	0	0
							GSE26639	GSM655727	0	0	0
							GSE26639	GSM655728	0	0	0
							GSE26639	GSM655730	0	0	0
							GSE26639	GSM655731	0	0	0
							GSE26639	GSM655732	0	0	0
							GSE26639	GSM655734	0	0	0
							GSE26639	GSM655735	0	0	0
							GSE26639	GSM655736	0	0	0
							GSE26639	GSM655738	0	0	0
							GSE26639	GSM655739	0	0	0
							GSE26639	GSM655740	0	0	0
							GSE26639	GSM655741	0	0	0
							GSE26639	GSM655743	0	0	0
							GSE26639	GSM655744	0	0	0
							GSE26639	GSM655745	0	0	0
							GSE26639	GSM655746	0	0	0
							GSE26639	GSM655748	0	0	0
							GSE26639	GSM655749	0	0	0
							GSE26639	GSM655752	0	0	0
							GSE26639	GSM655753	0	0	0
							GSE26639	GSM655754	0	0	0
							GSE26639	GSM655755	0	0	0
							GSE26639	GSM655756	0	0	0
							GSE26639	GSM655758	0	0	0
							GSE26639	GSM655759	0	0	0
							GSE26639	GSM655760	0	0	0
							GSE26639	GSM655762	0	0	0
							GSE26639	GSM655763	0	0	0
							GSE26639	GSM655764	0	0	0
							GSE26639	GSM655790	0	0	0
							GSE26639	GSM655791	0	0	0
							GSE26639	GSM655792	0	0	0
							GSE26639	GSM655793	0	0	0
							GSE26639	GSM655795	0	0	0
							GSE26639	GSM655796	0	0	0
							GSE26639	GSM655797	0	0	0
							GSE26639	GSM655799	0	0	0
							GSE26639	GSM655800	0	0	0
							GSE26639	GSM655801	0	0	0
							GSE26639	GSM655802	0	0	0
							GSE26639	GSM655814	0	0	0
							GSE26639	GSM655815	0	0	0
							GSE26639	GSM655816	0	0	0
							GSE26639	GSM655817	0	0	0
							GSE26639	GSM655818	0	0	0
							GSE26639	GSM655829	0	0	0
							GSE26639	GSM655830	0	0	0
							GSE26639	GSM655831	0	0	0
							GSE26639	GSM655833	0	0	0
							GSE26639	GSM655834	0	0	0
							GSE26639	GSM655836	0	0	0
							GSE26639	GSM655837	0	0	0
							GSE26639	GSM655838	0	0	0
							GSE26639	GSM655840	0	0	0
							GSE26639	GSM655841	0	0	0
							GSE26639	GSM655844	0	0	0
							GSE19697	GSM491611	0	0	0
							GSE19697	GSM491612	0	0	0
							GSE19697	GSM491613	0	0	0
							GSE19697	GSM491614	0	0	0
							GSE19697	GSM491615	0	0	0
							GSE19697	GSM491617	0	0	0
							GSE19697	GSM491618	0	0	0
							GSE19697	GSM491626	0	0	0
							GSE19697	GSM491628	0	0	0
							GSE19697	GSM491630	0	0	0
							GSE19697	GSM491631	0	0	0
							GSE19697	GSM491632	0	0	0
							GSE17907	GSM447207	0	0	0
							GSE17907	GSM447227	0	0	0
							GSE16446	GSM411296	0	0	0
							GSE16446	GSM411297	0	0	0
							GSE16446	GSM411309	0	0	0
							GSE16446	GSM411310	0	0	0
							GSE16446	GSM411311	0	0	0
							GSE16446	GSM411312	0	0	0
							GSE16446	GSM411313	0	0	0
							GSE16446	GSM411314	0	0	0
							GSE16446	GSM411315	0	0	0
							GSE16446	GSM411316	0	0	0
							GSE16446	GSM411319	0	0	0
							GSE16446	GSM411320	0	0	0
							GSE16446	GSM411322	0	0	0
							GSE16446	GSM411323	0	0	0
							GSE16446	GSM411325	0	0	0
							GSE16446	GSM411326	0	0	0
							GSE16446	GSM411327	0	0	0
							GSE16446	GSM411328	0	0	0
							GSE16446	GSM411329	0	0	0
							GSE16446	GSM411331	0	0	0
							GSE16446	GSM411333	0	0	0
							GSE16446	GSM411334	0	0	0
							GSE16446	GSM411335	0	0	0
							GSE16446	GSM411336	0	0	0
							GSE16446	GSM411337	0	0	0
							GSE16446	GSM411339	0	0	0
							GSE16446	GSM411340	0	0	0
							GSE16446	GSM411341	0	0	0
							GSE16446	GSM411342	0	0	0
							GSE16446	GSM411345	0	0	0
							GSE16446	GSM411346	0	0	0
							GSE16446	GSM411347	0	0	0
							GSE16446	GSM411348	0	0	0
							GSE16446	GSM411349	0	0	0
							GSE16446	GSM411350	0	0	0
							GSE16446	GSM411352	0	0	0
							GSE16446	GSM411353	0	0	0
							GSE16446	GSM411354	0	0	0
							GSE16446	GSM411355	0	0	0
							GSE16446	GSM411356	0	0	0
							GSE16446	GSM411360	0	0	0
							GSE16446	GSM411361	0	0	0
							GSE16446	GSM411368	0	0	0
							GSE16446	GSM411394	0	0	0
							GSE16446	GSM411396	0	0	0
							GSE16446	GSM411397	0	0	0
							GSE16446	GSM411398	0	0	0
							GSE16446	GSM411399	0	0	0
							GSE16446	GSM411401	0	0	0
							GSE20194	GSM505328	0	0	0
							GSE20194	GSM505330	0	0	0
							GSE20194	GSM505331	0	0	0
							GSE20194	GSM505333	0	0	0
							GSE20194	GSM505336	0	0	0
							GSE20194	GSM505337	0	0	0
							GSE20194	GSM505338	0	0	0
							GSE20194	GSM505339	0	0	0
							GSE20194	GSM505343	0	0	0
							GSE20194	GSM505344	0	0	0
							GSE20194	GSM505345	0	0	0
							GSE20194	GSM505346	0	0	0
							GSE20194	GSM505347	0	0	0
							GSE20194	GSM505348	0	0	0
							GSE20194	GSM505350	0	0	0
							GSE20194	GSM505351	0	0	0
							GSE20194	GSM505355	0	0	0
							GSE20194	GSM505358	0	0	0
							GSE20194	GSM505359	0	0	0
							GSE20194	GSM505360	0	0	0
							GSE20194	GSM505361	0	0	0
							GSE20194	GSM505363	0	0	0
							GSE20194	GSM505364	0	0	0
							GSE20194	GSM505365	0	0	0
							GSE20194	GSM505366	0	0	0
							GSE20194	GSM505369	0	0	0
							GSE20194	GSM505370	0	0	0
							GSE20194	GSM505371	0	0	0
							GSE20194	GSM505372	0	0	0
							GSE20194	GSM505378	0	0	0
							GSE20194	GSM505379	0	0	0
							GSE20194	GSM505382	0	0	0
							GSE20194	GSM505383	0	0	0
							GSE20194	GSM505398	0	0	0
							GSE20194	GSM505399	0	0	0
							GSE20194	GSM505408	0	0	0
							GSE20194	GSM505409	0	0	0
							GSE20194	GSM505411	0	0	0
							GSE20194	GSM505412	0	0	0
							GSE20194	GSM505413	0	0	0
							GSE20194	GSM505415	0	0	0
							GSE20194	GSM505416	0	0	0
							GSE20194	GSM505420	0	0	0
							GSE20194	GSM505421	0	0	0
							GSE20194	GSM505422	0	0	0
							GSE20194	GSM505423	0	0	0
							GSE20194	GSM505424	0	0	0
							GSE20194	GSM505427	0	0	0
							GSE20194	GSM505428	0	0	0
							GSE20194	GSM505432	0	0	0
							GSE20194	GSM505433	0	0	0
							GSE20194	GSM505438	0	0	0
							GSE20194	GSM505440	0	0	0
							GSE20194	GSM505442	0	0	0
							GSE20194	GSM505446	0	0	0
							GSE20194	GSM505448	0	0	0
							GSE20194	GSM505450	0	0	0
							GSE20194	GSM505453	0	0	0
							GSE20194	GSM505454	0	0	0
							GSE20194	GSM505455	0	0	0
							GSE20194	GSM505456	0	0	0
							GSE20194	GSM505458	0	0	0
							GSE20194	GSM505459	0	0	0
							GSE20194	GSM505460	0	0	0
							GSE20194	GSM505462	0	0	0
							GSE20194	GSM505464	0	0	0
							GSE20194	GSM505466	0	0	0
							GSE20194	GSM505467	0	0	0
							GSE20194	GSM505468	0	0	0
							GSE20194	GSM505469	0	0	0
							GSE20194	GSM505471	0	0	0
							GSE20194	GSM505472	0	0	0
							GSE20194	GSM505475	0	0	0
							GSE20194	GSM505476	0	0	0
							GSE20194	GSM505478	0	0	0
							GSE20194	GSM505479	0	0	0
							GSE20194	GSM505480	0	0	0
							GSE20194	GSM505481	0	0	0
							GSE20194	GSM505483	0	0	0
							GSE20194	GSM505485	0	0	0
							GSE20194	GSM505486	0	0	0
							GSE20194	GSM505488	0	0	0
							GSE20194	GSM505503	0	0	0
							GSE20194	GSM505510	0	0	0
							GSE20194	GSM505513	0	0	0
							GSE20194	GSM505514	0	0	0
							GSE20194	GSM505515	0	0	0
							GSE20194	GSM505516	0	0	0
							GSE20194	GSM505517	0	0	0
							GSE20194	GSM505518	0	0	0
							GSE20194	GSM505519	0	0	0
							GSE20194	GSM505520	0	0	0
							GSE20194	GSM505523	0	0	0
							GSE20194	GSM505525	0	0	0
							GSE20194	GSM505526	0	0	0
							GSE20194	GSM505527	0	0	0
							GSE20194	GSM505528	0	0	0
							GSE20194	GSM505530	0	0	0
							GSE20194	GSM505532	0	0	0
							GSE20194	GSM505533	0	0	0
							GSE20194	GSM505534	0	0	0
							GSE20194	GSM505535	0	0	0
							GSE20194	GSM505536	0	0	0
							GSE20194	GSM505537	0	0	0
							GSE20194	GSM505538	0	0	0
							GSE20194	GSM505539	0	0	0
							GSE20194	GSM505540	0	0	0
							GSE20194	GSM505541	0	0	0
							GSE20194	GSM505542	0	0	0
							GSE20194	GSM505543	0	0	0
							GSE20194	GSM505544	0	0	0
							GSE20194	GSM505547	0	0	0
							GSE20194	GSM505548	0	0	0
							GSE20194	GSM505549	0	0	0
							GSE20194	GSM505550	0	0	0
							GSE20194	GSM505551	0	0	0
							GSE20194	GSM505552	0	0	0
							GSE20194	GSM505553	0	0	0
							GSE20194	GSM505554	0	0	0
							GSE20194	GSM505556	0	0	0
							GSE20194	GSM505557	0	0	0
							GSE20194	GSM505558	0	0	0
							GSE20194	GSM505559	0	0	0
							GSE20194	GSM505560	0	0	0
							GSE20194	GSM505561	0	0	0
							GSE20194	GSM505562	0	0	0
							GSE20194	GSM505563	0	0	0
							GSE20194	GSM505564	0	0	0
							GSE20194	GSM505565	0	0	0
							GSE20194	GSM505566	0	0	0
							GSE20194	GSM505567	0	0	0
							GSE20194	GSM505568	0	0	0
							GSE20194	GSM505569	0	0	0
							GSE20194	GSM505570	0	0	0
							GSE20194	GSM505571	0	0	0
							GSE20194	GSM505572	0	0	0
							GSE20194	GSM505573	0	0	0
							GSE20194	GSM505574	0	0	0
							GSE20194	GSM505575	0	0	0
							GSE20194	GSM505577	0	0	0
							GSE20194	GSM505578	0	0	0
							GSE20194	GSM505579	0	0	0
							GSE20194	GSM505580	0	0	0
							GSE20194	GSM505581	0	0	0
							GSE20194	GSM505582	0	0	0
							GSE20194	GSM505583	0	0	0
							GSE20194	GSM505584	0	0	0
							GSE20194	GSM505586	0	0	0
							GSE20194	GSM505587	0	0	0
							GSE20194	GSM505588	0	0	0
							GSE20194	GSM505590	0	0	0
							GSE20194	GSM505591	0	0	0
							GSE20194	GSM505592	0	0	0
							GSE20194	GSM505593	0	0	0
							GSE20194	GSM505594	0	0	0
							GSE20194	GSM505596	0	0	0
							GSE20194	GSM505597	0	0	0
							GSE20194	GSM505598	0	0	0
							GSE20194	GSM505600	0	0	0
							GSE20194	GSM505601	0	0	0
							GSE20194	GSM505602	0	0	0
							GSE20194	GSM505603	0	0	0
							GSE20194	GSM505604	0	0	0
							GSE20194	GSM505605	0	0	0
							GSE22358	GSM508525	5	1	1
							GSE22358	GSM508551	5	1	1
							GSE22358	GSM508564	5	1	1
							GSE22358	GSM508566	5	1	1
							GSE22358	GSM508586	5	1	1
							GSE22358	GSM508589	5	1	1
							GSE22358	GSM508591	5	1	1
							GSE22358	GSM508630	5	1	1
							GSE22358	GSM508631	5	1	1
							GSE22358	GSM508633	5	1	1
							GSE22358	GSM508635	5	1	1
							GSE22358	GSM508636	5	1	1
							GSE22358	GSM508640	5	1	1
							GSE22358	GSM508650	5	1	1
							GSE22358	GSM508653	5	1	1
							GSE22358	GSM508660	5	1	1
							GSE22358	GSM508670	5	1	1
							GSE22358	GSM508767	5	1	1
							GSE22358	GSM508769	5	1	1
							GSE22358	GSM508775	5	1	1
							GSE22358	GSM517353	5	1	1
							GSE5460	GSM124994	5	1	1
							GSE5460	GSM124996	5	1	1
							GSE5460	GSM125001	5	1	1
							GSE5460	GSM125013	5	1	1
							GSE5460	GSM125021	5	1	1
							GSE5460	GSM125048	5	1	1
							GSE5460	GSM125066	5	1	1
							GSE5460	GSM125069	5	1	1
							GSE5460	GSM125072	5	1	1
							GSE5460	GSM125073	5	1	1
							GSE5460	GSM125078	5	1	1
							GSE5460	GSM125085	5	1	1
							GSE5460	GSM125090	5	1	1
							GSE5460	GSM125109	5	1	1
							GSE5460	GSM125110	5	1	1
							GSE5460	GSM125115	5	1	1
							GSE5460	GSM125116	5	1	1
							GSE5460	GSM125120	5	1	1
							GSE21653	GSM540109	5	1	1
							GSE21653	GSM540111	5	1	1
							GSE21653	GSM540124	5	1	1
							GSE21653	GSM540162	5	1	1
							GSE21653	GSM540206	5	1	1
							GSE21653	GSM540216	5	1	1
							GSE21653	GSM540235	5	1	1
							GSE21653	GSM540236	5	1	1
							GSE21653	GSM540257	5	1	1
							GSE21653	GSM540268	5	1	1
							GSE21653	GSM540274	5	1	1
							GSE21653	GSM540280	5	1	1
							GSE21653	GSM540291	5	1	1
							GSE21653	GSM540297	5	1	1
							GSE21653	GSM540300	5	1	1
							GSE21653	GSM540311	5	1	1
							GSE21653	GSM540340	5	1	1
							GSE26639	GSM655625	5	1	1
							GSE26639	GSM655627	5	1	1
							GSE26639	GSM655631	5	1	1
							GSE26639	GSM655634	5	1	1
							GSE26639	GSM655639	5	1	1
							GSE26639	GSM655645	5	1	1
							GSE26639	GSM655646	5	1	1
							GSE26639	GSM655651	5	1	1
							GSE26639	GSM655652	5	1	1
							GSE26639	GSM655656	5	1	1
							GSE26639	GSM655657	5	1	1
							GSE26639	GSM655658	5	1	1
							GSE26639	GSM655664	5	1	1
							GSE26639	GSM655669	5	1	1
							GSE26639	GSM655671	5	1	1
							GSE26639	GSM655673	5	1	1
							GSE26639	GSM655680	5	1	1
							GSE26639	GSM655681	5	1	1
							GSE26639	GSM655682	5	1	1
							GSE26639	GSM655683	5	1	1
							GSE26639	GSM655685	5	1	1
							GSE26639	GSM655686	5	1	1
							GSE26639	GSM655688	5	1	1
							GSE26639	GSM655689	5	1	1
							GSE26639	GSM655691	5	1	1
							GSE26639	GSM655694	5	1	1
							GSE26639	GSM655697	5	1	1
							GSE26639	GSM655698	5	1	1
							GSE26639	GSM655701	5	1	1
							GSE26639	GSM655715	5	1	1
							GSE26639	GSM655767	5	1	1
							GSE26639	GSM655768	5	1	1
							GSE26639	GSM655769	5	1	1
							GSE26639	GSM655770	5	1	1
							GSE26639	GSM655772	5	1	1
							GSE26639	GSM655773	5	1	1
							GSE26639	GSM655774	5	1	1
							GSE26639	GSM655775	5	1	1
							GSE26639	GSM655776	5	1	1
							GSE26639	GSM655777	5	1	1
							GSE26639	GSM655779	5	1	1
							GSE26639	GSM655780	5	1	1
							GSE26639	GSM655781	5	1	1
							GSE26639	GSM655782	5	1	1
							GSE26639	GSM655783	5	1	1
							GSE26639	GSM655784	5	1	1
							GSE26639	GSM655786	5	1	1
							GSE26639	GSM655789	5	1	1
							GSE26639	GSM655803	5	1	1
							GSE26639	GSM655805	5	1	1
							GSE26639	GSM655808	5	1	1
							GSE26639	GSM655811	5	1	1
							GSE26639	GSM655812	5	1	1
							GSE26639	GSM655813	5	1	1
							GSE26639	GSM655820	5	1	1
							GSE26639	GSM655821	5	1	1
							GSE26639	GSM655822	5	1	1
							GSE26639	GSM655823	5	1	1
							GSE26639	GSM655824	5	1	1
							GSE26639	GSM655825	5	1	1
							GSE26639	GSM655845	5	1	1
							GSE26639	GSM655846	5	1	1
							GSE26639	GSM655848	5	1	1
							GSE26639	GSM655849	5	1	1
							GSE17907	GSM447225	5	1	1
							GSE17907	GSM447231	5	1	1
							GSE16446	GSM411292	5	1	1
							GSE16446	GSM411293	5	1	1
							GSE16446	GSM411294	5	1	1
							GSE16446	GSM411298	5	1	1
							GSE16446	GSM411299	5	1	1
							GSE16446	GSM411300	5	1	1
							GSE16446	GSM411301	5	1	1
							GSE16446	GSM411305	5	1	1
							GSE16446	GSM411366	5	1	1
							GSE24185	GSM594855	4	1	1
							GSE24185	GSM594922	4	1	1
							GSE24185	GSM594924	4	1	1
							GSE24185	GSM594928	4	1	1
							GSE24185	GSM594936	4	1	1
							GSE24185	GSM594940	4	1	1
							GSE24185	GSM594954	4	1	1
							GSE22358	GSM508552	4	1	1
							GSE22358	GSM508565	4	1	1
							GSE22358	GSM508576	4	1	1
							GSE22358	GSM508588	4	1	1
							GSE22358	GSM508641	4	1	1
							GSE25066	GSM615209	4	1	1
							GSE25066	GSM615230	4	1	1
							GSE25066	GSM615271	4	1	1
							GSE25066	GSM615743	4	1	1
							GSE25066	GSM615746	4	1	1
							GSE25066	GSM615750	4	1	1
							GSE25066	GSM615774	4	1	1
							GSE25066	GSM615775	4	1	1
							GSE25066	GSM615785	4	1	1
							GSE25066	GSM615796	4	1	1
							GSE25066	GSM615803	4	1	1
							GSE25066	GSM615805	4	1	1
							GSE2603	GSM50034	4	1	1
							GSE2603	GSM50065	4	1	1
							GSE2603	GSM50072	4	1	1
							GSE2603	GSM50085	4	1	1
							GSE2603	GSM50103	4	1	1
							GSE2603	GSM50116	4	1	1
							GSE2603	GSM50117	4	1	1
							GSE2603	GSM50126	4	1	1
							GSE2603	GSM50130	4	1	1
							GSE5460	GSM124999	4	1	1
							GSE5460	GSM125027	4	1	1
							GSE5460	GSM125029	4	1	1
							GSE5460	GSM125033	4	1	1
							GSE21653	GSM540251	4	1	1
							GSE21653	GSM540272	4	1	1
							GSE21653	GSM540315	4	1	1
							GSE26639	GSM655771	4	1	1
							GSE26639	GSM655806	4	1	1
							GSE26639	GSM655807	4	1	1
							GSE26639	GSM655809	4	1	1
							GSE26639	GSM655847	4	1	1
							GSE16446	GSM411302	4	1	1
							GSE16446	GSM411330	4	1	1
							GSE20194	GSM505329	4	1	1
							GSE20194	GSM505335	4	1	1
							GSE20194	GSM505340	4	1	1
							GSE20194	GSM505341	4	1	1
							GSE20194	GSM505342	4	1	1
							GSE20194	GSM505356	4	1	1
							GSE20194	GSM505362	4	1	1
							GSE20194	GSM505367	4	1	1
							GSE20194	GSM505373	4	1	1
							GSE20194	GSM505376	4	1	1
							GSE20194	GSM505377	4	1	1
							GSE20194	GSM505380	4	1	1
							GSE20194	GSM505381	4	1	1
							GSE20194	GSM505384	4	1	1
							GSE20194	GSM505385	4	1	1
							GSE20194	GSM505386	4	1	1
							GSE20194	GSM505387	4	1	1
							GSE20194	GSM505390	4	1	1
							GSE20194	GSM505391	4	1	1
							GSE20194	GSM505394	4	1	1
							GSE20194	GSM505395	4	1	1
							GSE20194	GSM505400	4	1	1
							GSE20194	GSM505401	4	1	1
							GSE20194	GSM505404	4	1	1
							GSE20194	GSM505405	4	1	1
							GSE20194	GSM505414	4	1	1
							GSE20194	GSM505419	4	1	1
							GSE20194	GSM505425	4	1	1
							GSE20194	GSM505429	4	1	1
							GSE20194	GSM505434	4	1	1
							GSE20194	GSM505437	4	1	1
							GSE20194	GSM505443	4	1	1
							GSE20194	GSM505445	4	1	1
							GSE20194	GSM505447	4	1	1
							GSE20194	GSM505461	4	1	1
							GSE20194	GSM505482	4	1	1
							GSE20194	GSM505505	4	1	1
							GSE20194	GSM505511	4	1	1
							GSE20194	GSM505521	4	1	1
							GSE20194	GSM505546	4	1	1
							GSE24185	GSM594878	3	1	1
							GSE24185	GSM594915	3	1	1
							GSE25066	GSM615224	3	1	1
							GSE25066	GSM615236	3	1	1
							GSE25066	GSM615238	3	1	1
							GSE25066	GSM615280	3	1	1
							GSE25066	GSM615688	3	1	1
							GSE25066	GSM615689	3	1	1
							GSE25066	GSM615695	3	1	1
							GSE5460	GSM125070	3	1	1
							GSE21653	GSM540347	3	1	1
							GSE26639	GSM655641	3	1	1
							GSE26639	GSM655702	3	1	1
							GSE26639	GSM655710	3	1	1
							GSE26639	GSM655722	3	1	1
							GSE26639	GSM655788	3	1	1
							GSE26639	GSM655810	3	1	1
							GSE17907	GSM447198	3	1	1
							GSE17907	GSM447209	3	1	1
							GSE17907	GSM447211	3	1	1
							GSE17907	GSM447219	3	1	1
							GSE17907	GSM447221	3	1	1
							GSE17907	GSM447229	3	1	1
							GSE17907	GSM447233	3	1	1
							GSE20194	GSM505349	3	1	1
							GSE20194	GSM505388	3	1	1
							GSE20194	GSM505389	3	1	1
							GSE20194	GSM505463	3	1	1
							GSE24185	GSM594868	2	0	1
							GSE24185	GSM594901	2	0	1
							GSE22358	GSM508742	2	0	1
							GSE22358	GSM508766	2	0	1
							GSE25066	GSM615365	2	0	1
							GSE25066	GSM615697	2	0	1
							GSE25066	GSM615705	2	0	1
							GSE25066	GSM615737	2	0	1
							GSE25066	GSM615772	2	0	1
							GSE25066	GSM615797	2	0	1
							GSE21653	GSM540265	2	0	1
							GSE21653	GSM540270	2	0	1
							GSE26639	GSM655787	2	0	1
							GSE17907	GSM447199	2	0	1
							GSE17907	GSM447200	2	0	1
							GSE17907	GSM447206	2	0	1
							GSE17907	GSM447215	2	0	1
							GSE17907	GSM447222	2	0	1
							GSE20194	GSM505410	2	0	1
							GSE20194	GSM505418	2	0	1
							GSE20194	GSM505431	2	0	1
							GSE20194	GSM505441	2	0	1
							GSE20194	GSM505531	2	0	1
							GSE22358	GSM508749	1	0	1
							GSE25066	GSM615203	1	0	1
							GSE25066	GSM615210	1	0	1
							GSE25066	GSM615267	1	0	1
							GSE25066	GSM615374	1	0	1
							GSE5460	GSM125037	1	0	1
							GSE5460	GSM125040	1	0	1
							GSE5460	GSM125076	1	0	1
							GSE21653	GSM540282	1	0	1
							GSE21653	GSM540295	1	0	1
							GSE26639	GSM655665	1	0	1
							GSE26639	GSM655785	1	0	1
							GSE19697	GSM491622	1	0	1
							GSE17907	GSM447197	1	0	1
							GSE17907	GSM447202	1	0	1
							GSE17907	GSM447203	1	0	1
							GSE17907	GSM447213	1	0	1
							GSE17907	GSM447214	1	0	1
							GSE17907	GSM447216	1	0	1
							GSE17907	GSM447218	1	0	1
							GSE17907	GSM447226	1	0	1
							GSE17907	GSM447246	1	0	1
							GSE24185	GSM594861	0	0	1
							GSE22358	GSM508545	0	0	1
							GSE22358	GSM508555	0	0	1
							GSE22358	GSM508563	0	0	1
							GSE22358	GSM508667	0	0	1
							GSE22358	GSM508774	0	0	1
							GSE2603	GSM50057	0	0	1
							GSE2603	GSM50058	0	0	1
							GSE2603	GSM50082	0	0	1
							GSE2603	GSM50088	0	0	1
							GSE5460	GSM125034	0	0	1
							GSE5460	GSM125036	0	0	1
							GSE5460	GSM125039	0	0	1
							GSE5460	GSM125087	0	0	1
							GSE5460	GSM125104	0	0	1
							GSE21653	GSM540110	0	0	1
							GSE21653	GSM540155	0	0	1
							GSE21653	GSM540331	0	0	1
							GSE26639	GSM655700	0	0	1
							GSE26639	GSM655778	0	0	1
							GSE26639	GSM655804	0	0	1
							GSE19697	GSM491610	0	0	1
							GSE17907	GSM447201	0	0	1
							GSE17907	GSM447204	0	0	1
							GSE17907	GSM447205	0	0	1
							GSE17907	GSM447210	0	0	1
							GSE17907	GSM447212	0	0	1
							GSE17907	GSM447217	0	0	1
							GSE17907	GSM447223	0	0	1
							GSE17907	GSM447224	0	0	1
							GSE17907	GSM447230	0	0	1
							GSE17907	GSM447232	0	0	1
							GSE17907	GSM447234	0	0	1
							GSE17907	GSM447243	0	0	1
							GSE17907	GSM447244	0	0	1
							GSE17907	GSM447245	0	0	1
							GSE17907	GSM447247	0	0	1
							GSE16446	GSM411295	0	0	1
							GSE16446	GSM411304	0	0	1
							GSE16446	GSM411307	0	0	1
							GSE16446	GSM411321	0	0	1
							GSE16446	GSM411338	0	0	1
							GSE16446	GSM411351	0	0	1
							GSE16446	GSM411358	0	0	1
							GSE16446	GSM411362	0	0	1
							GSE16446	GSM411363	0	0	1
							GSE16446	GSM411364	0	0	1
							GSE16446	GSM411365	0	0	1
							GSE16446	GSM411367	0	0	1
							GSE16446	GSM411393	0	0	1
							GSE16446	GSM411395	0	0	1
							GSE16446	GSM411402	0	0	1
							GSE16446	GSM411403	0	0	1
							GSE16446	GSM411404	0	0	1
							GSE16446	GSM411405	0	0	1
							GSE16446	GSM411406	0	0	1
							GSE16446	GSM411407	0	0	1
							GSE20194	GSM505417	0	0	1
							GSE20194	GSM505435	0	0	1
							GSE20194	GSM505439	0	0	1
							GSE20194	GSM505504	0	0	1
							GSE20194	GSM505507	0	0	1
							GSE20194	GSM505522	0	0	1
							GSE21653	GSM540147	5		NA
							GSE21653	GSM540174	5		NA
							GSE21653	GSM540180	5		NA
							GSE21653	GSM540252	5		NA
							GSE21653	GSM540309	5		NA
							GSE21653	GSM540323	5		NA
							GSE21653	GSM540327	5		NA
							GSE16446	GSM411291	5		NA
							GSE16446	GSM411371	5		NA
							GSE16446	GSM411376	5		NA
							GSE16446	GSM411378	5		NA
							GSE16446	GSM411380	5		NA
							GSE16446	GSM411381	5		NA
							GSE16446	GSM411382	5		NA
							GSE16446	GSM411390	5		NA
							GSE16446	GSM411375	4		NA
							GSE16446	GSM411377	4		NA
							GSE16446	GSM411379	3		NA
							GSE16446	GSM411387	2		NA
							GSE21653	GSM540139	1		NA
							GSE21653	GSM540185	1		NA
							GSE21653	GSM540187	1		NA
							GSE21653	GSM540210	1		NA
							GSE21653	GSM540222	1		NA
							GSE21653	GSM540326	1		NA
							GSE16446	GSM411372	1		NA
							GSE16446	GSM411374	1		NA
							GSE16446	GSM411383	1		NA
							GSE21653	GSM540175	0		NA
							GSE21653	GSM540211	0		NA
							GSE21653	GSM540227	0		NA
							GSE21653	GSM540301	0		NA
							GSE21653	GSM540312	0		NA
							GSE21653	GSM540324	0		NA
							GSE21653	GSM540335	0		NA
							GSE16446	GSM411369	0		NA
							GSE16446	GSM411370	0		NA
							GSE16446	GSM411373	0		NA
							GSE16446	GSM411384	0		NA
							GSE16446	GSM411385	0		NA
							GSE16446	GSM411386	0		NA
							GSE16446	GSM411388	0		NA
							GSE16446	GSM411389	0		NA
							GSE16446	GSM411391	0		NA
							GSE16446	GSM411392	0		NA
							GSE16446	GSM411408	0		NA
							GSE16446	GSM411409	0		NA
							GSE21653	GSM540289	5		NA
							GSE24185	GSM594881	4		NA
							GSE24185	GSM594886	4		NA
							GSE24185	GSM594913	4		NA
							GSE24185	GSM594914	4		NA
							GSE24185	GSM594917	4		NA
							GSE24185	GSM594918	4		NA
							GSE24185	GSM594919	4		NA
							GSE2603	GSM50105	4		NA
							GSE20194	GSM505494	4		NA
							GSE24185	GSM594887	3		NA
							GSE2603	GSM50099	3		NA
							GSE17907	GSM447241	3		NA
							GSE20194	GSM505499	3		NA
							GSE24185	GSM594874	2		NA
							GSE24185	GSM594949	2		NA
							GSE17907	GSM447220	2		NA
							GSE17907	GSM447236	2		NA
							GSE17907	GSM447237	2		NA
							GSE17907	GSM447238	2		NA
							GSE20194	GSM505470	2		NA
							GSE24185	GSM594879	1		NA
							GSE24185	GSM594905	1		NA
							GSE24185	GSM594911	1		NA
							GSE24185	GSM594952	1		NA
							GSE24185	GSM594956	1		NA
							GSE20194	GSM505484	1		NA
							GSE20194	GSM505493	1		NA
							GSE20194	GSM505495	1		NA
							GSE20194	GSM505498	1		NA
							GSE20194	GSM505501	1		NA
							GSE20194	GSM505555	1		NA
							GSE20194	GSM505576	1		NA
							GSE24185	GSM594869	0		NA
							GSE24185	GSM594870	0		NA
							GSE24185	GSM594872	0		NA
							GSE24185	GSM594875	0		NA
							GSE24185	GSM594876	0		NA
							GSE24185	GSM594877	0		NA
							GSE24185	GSM594880	0		NA
							GSE24185	GSM594882	0		NA
							GSE24185	GSM594884	0		NA
							GSE24185	GSM594885	0		NA
							GSE24185	GSM594888	0		NA
							GSE24185	GSM594889	0		NA
							GSE24185	GSM594903	0		NA
							GSE24185	GSM594906	0		NA
							GSE24185	GSM594908	0		NA
							GSE24185	GSM594910	0		NA
							GSE24185	GSM594912	0		NA
							GSE24185	GSM594916	0		NA
							GSE24185	GSM594950	0		NA
							GSE24185	GSM594951	0		NA
							GSE24185	GSM594955	0		NA
							GSE24185	GSM594957	0		NA
							GSE22358	GSM556167	0		NA
							GSE22358	GSM556168	0		NA
							GSE22358	GSM556169	0		NA
							GSE22358	GSM556170	0		NA
							GSE2603	GSM50037	0		NA
							GSE2603	GSM50041	0		NA
							GSE2603	GSM50045	0		NA
							GSE2603	GSM50050	0		NA
							GSE2603	GSM50056	0		NA
							GSE2603	GSM50081	0		NA
							GSE2603	GSM50090	0		NA
							GSE2603	GSM50109	0		NA
							GSE2603	GSM50129	0		NA
							GSE21653	GSM540290	0		NA
							GSE17907	GSM447235	0		NA
							GSE17907	GSM447239	0		NA
							GSE17907	GSM447240	0		NA
							GSE17907	GSM447242	0		NA
							GSE17907	GSM447248	0		NA
							GSE17907	GSM447249	0		NA
							GSE17907	GSM447250	0		NA
							GSE17907	GSM447251	0		NA
							GSE20194	GSM505436	0		NA
							GSE20194	GSM505452	0		NA
							GSE20194	GSM505489	0		NA
							GSE20194	GSM505490	0		NA
							GSE20194	GSM505492	0		NA
							GSE20194	GSM505496	0		NA
							GSE20194	GSM505497	0		NA
							GSE20194	GSM505502	0		NA
							GSE20194	GSM505508	0		NA
